# Supplementary material
Source: publisher figshare collection journal article supplement (https://tandf.figshare.com/ndownloader/files/13745837)
Supplement: Supplementary file 1 [file 13745837]

**Supplementary Table 1. Spearman's rho correlations between patient clinical variables and behavioural symptoms of apathy**

|  | AES-B | Sx duration | ALSFRS-R | M-ACE | MiND-B | HADS-A |
| --- | --- | --- | --- | --- | --- | --- |
| AES-B |  |  |  |  |  |  |
| Sx duration | 0.17 |  |  |  |  |  |
| ALSFRS-R | -0.16 | **-0.36** |  |  |  |  |
| M-ACE | -0.47 | -0.24 | 0.09 |  |  |  |
| MiND-B | -0.50 | -0.04 | -0.12 | 0.23 |  |  |
| HADS-A | 0.08 | -0.12 | -0.12 | -0.13 | 0.09 |  |
| HADS-D | **0.29** | 0.07 | **-0.33** | -0.19 | -0.06 | 0.39 |

AES-B = Apathy Evaluation Scale- Behavioural symptoms of apathy; Sx = Symptom; ALSFRS-R = ALS Functional Rating Scale- Revised total score; M-ACE = Mini-Addenbrooke’s Cognitive Examination total score; MiND-B = Motor Neuron Disease Behavioural Scale total score; HADS-A = Hospital Anxiety Depression Scale- Anxiety total score; HADS-D = Hospital Anxiety Depression Scale- Depression total score.

P-values shown in bold are significant at the .05 level.
